# Supplementary material for: Abnormal brain functional and structural connectivity between the left supplementary motor area and inferior frontal gyrus in moyamoya disease
Source: Springer Nature journal article supplement (doi:10.1186/s12883-022-02705-2), 2022-05-16
Supplement: MOESM1 [file 20417776]

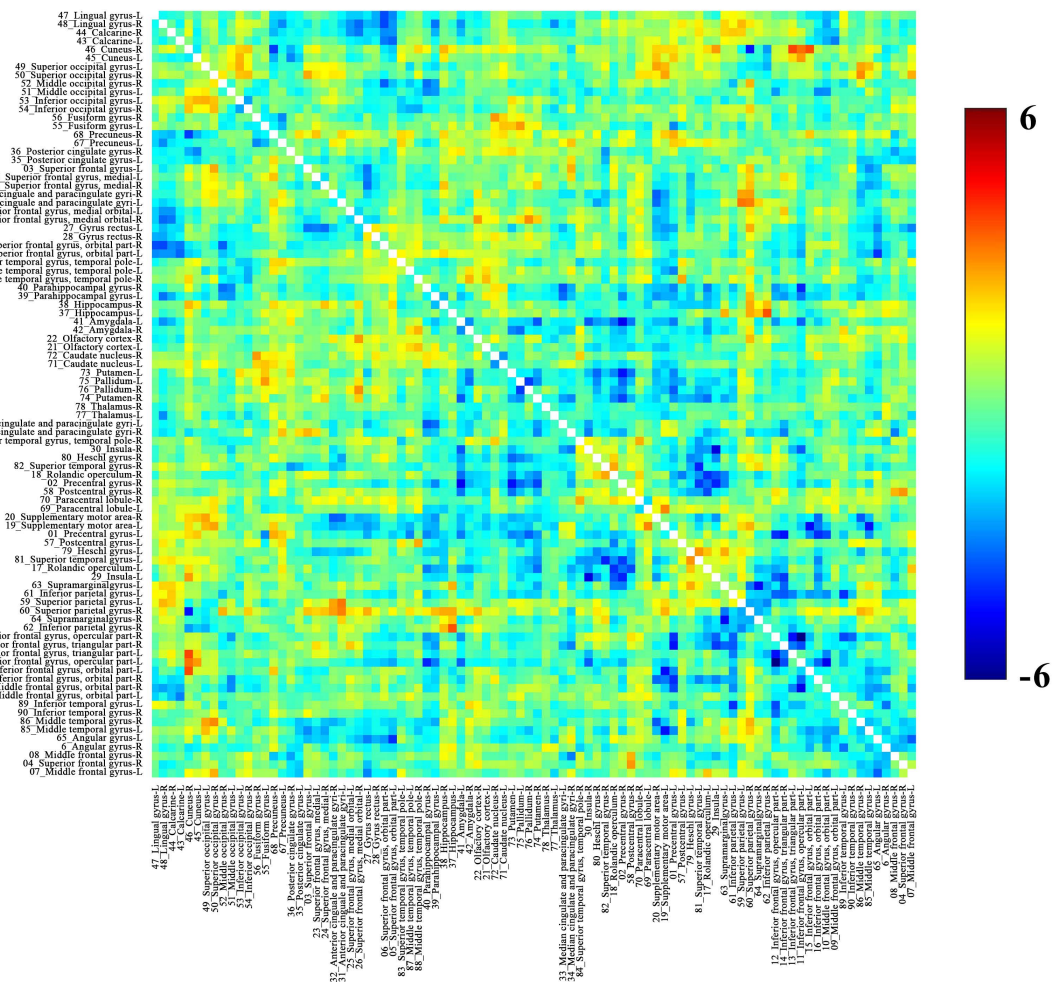

**Supplemental Figure 1.** This matrix is a summary of 90 ROIs from the Anatomical Automatic Labeling template-based statistical parametric maps of functional connectivity analyzed between the MMD group and HC. The matrix is 90 x 90, and each voxel stores a *T* statistic value ranging from 6 to -6. The red voxels indicate the functional connectivity of the MMD group is greater than HC, and blue is the opposite. The color bar is located at the right.

**Abbreviation:** MMD = moyamoya disease, HC = healthy controls, ROI = region of interest.

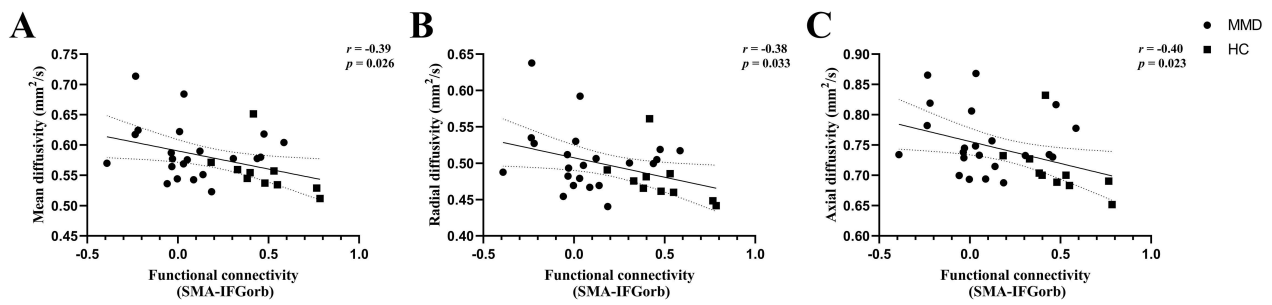

**Supplemental Figure 2.** A-C The correlation between functional connectivity and tensor metrics of the SMA-IFGorb in the left hemisphere of MMD patients and HC.

**Abbreviations:** MMD = moyamoya disease, HC = healthy controls, SMA = supplementary motor area, IFGorb = orbital part of the inferior frontal gyrus.

**Supplemental Table 1.** Demographics and clinical characteristics of 22 MMD patients

| Subject | Age | Gender | Clinical manifestation            | Mainly Affected Hemisphere | Time to onset | Smoking | Alcohol | HTN | Diabetes | HPL | Comorbidity            | Suzuki stage | mRS grade |
|---------|-----|--------|-----------------------------------|----------------------------|---------------|---------|---------|-----|----------|-----|------------------------|--------------|-----------|
| P001    | 51  | F      | Dizziness and headache            | /                          | 2 years       | N       | N       | N   | Y        | N   | Gastritis              | V            | 1         |
| P002    | 30  | M      | TIA                               | left                       | 1 month       | Y       | N       | N   | N        | N   | Erosive gastritis      | II           | 1         |
| P003    | 45  | M      | TIA                               | left                       | 1 month       | Y       | N       | Y   | N        | N   | Chronic colonitis      | III          | 1         |
| P004    | 44  | F      | IVH                               | right                      | 3 months      | N       | N       | N   | N        | Y   | /                      | III          | 2         |
| P005    | 34  | F      | IVH                               | left                       | 3 months      | N       | N       | N   | N        | Y   | ACoA                   | I            | 0         |
| P006    | 36  | M      | Thalamic hemorrhage with IVH      | right                      | 3 months      | Y       | N       | N   | N        | N   | /                      | II           | 0         |
| P007    | 42  | F      | IVH                               | right                      | 3 months      | N       | N       | N   | N        | N   | /                      | III          | 1         |
| P008    | 44  | F      | Headache                          | left                       | 1 year        | N       | N       | N   | N        | Y   | /                      | IV           | 1         |
| P009    | 53  | F      | TIA                               | right                      | 6 months      | N       | Y       | Y   | N        | N   | /                      | IV           | 1         |
| P010    | 58  | F      | Dizziness                         | /                          | 6 months      | N       | N       | N   | Y        | N   | /                      | II           | 1         |
| P011    | 54  | F      | TIA                               | left                       | 2 months      | N       | N       | Y   | Y        | N   | /                      | I            | 1         |
| P012    | 45  | F      | IVH with subarachnoid hemorrhage  | right                      | 4 months      | N       | N       | N   | N        | N   | /                      | II           | 1         |
| P013    | 56  | F      | Cerebral ischemia                 | left                       | 5 months      | N       | N       | N   | N        | N   | /                      | V            | 1         |
| P014    | 57  | F      | Dizziness                         | /                          | 6 months      | N       | N       | Y   | Y        | N   | /                      | I            | 1         |
| P015    | 34  | F      | Basal ganglia hemorrhage          | left                       | 18 months     | N       | N       | N   | N        | N   | /                      | III          | 1         |
| P016    | 50  | F      | Basal ganglia hemorrhage with IVH | left                       | 6 months      | N       | N       | N   | N        | N   | /                      | IV           | 1         |
| P017    | 52  | F      | Thalamic hemorrhage               | right                      | 5 months      | N       | N       | N   | Y        | N   | /                      | II           | 1         |
| P018    | 53  | F      | Dizziness                         | /                          | 10 years      | N       | N       | Y   | Y        | N   | /                      | I            | 1         |
| P019    | 52  | F      | TIA                               | left                       | 6 months      | N       | N       | N   | N        | N   | Cervicitis             | V            | 1         |
| P020    | 56  | F      | IVH                               | /                          | 4 months      | N       | N       | N   | N        | N   | Spinal disc herniation | III          | 0         |
| P021    | 31  | F      | TIA                               | left                       | 2 months      | N       | N       | N   | N        | N   | /                      | II           | 1         |
| P022    | 53  | F      | IVH                               | right                      | 3 months      | N       | N       | N   | N        | N   | Lung nodules           | II           | 0         |

Note. HTN = hypertension; HPL = hyperlipidemia; mRS = modified Rankin Scale; TIA = transient ischemic attacks; IVH = intraventricular hemorrhage; ACoA = anterior communicating aneurysm.

‘/’ in Mainly Affected Hemisphere means there is no laterality of hemorrhage or ischemia.
