# Supplementary material for: Abnormal brain functional and structural connectivity between the left supplementary motor area and inferior frontal gyrus in moyamoya disease
Source: Springer Nature journal article supplement (doi:10.1186/s12883-022-02705-2), 2022-05-16
Supplement: MOESM2 [file 20417776]

**Supplemental Table 2. Regions of interest included in AAL-atlas**

| Labels | abbr.     | Regions                                   | Labels | abbr.  | Regions                                |
|--------|-----------|-------------------------------------------|--------|--------|----------------------------------------|
| 1      | PreCG.L   | Precentral gyrus                          | 46     | CUN.R  | Cuneus                                 |
| 2      | PreCG.R   | Precentral gyrus                          | 47     | LING.L | Lingual gyrus                          |
| 3      | SFG.L     | Superior frontal gyrus                    | 48     | LING.R | Lingual gyrus                          |
| 4      | SFG.R     | Superior frontal gyrus                    | 49     | SOG.L  | Superior occipital gyrus               |
| 5      | SFGorb.L  | Superior frontal gyrus, orbital part      | 50     | SOG.R  | Superior occipital gyrus               |
| 6      | SFGorb.R  | Superior frontal gyrus, orbital part      | 51     | MOG.L  | Middle occipital gyrus                 |
| 7      | MFG.L     | Middle frontal gyrus                      | 52     | MOG.R  | Middle occipital gyrus                 |
| 8      | MFG.R     | Middle frontal gyrus                      | 53     | IOG.L  | Inferior occipital gyrus               |
| 9      | MFGorb.L  | Middle frontal gyrus, orbital part        | 54     | IOG.R  | Inferior occipital gyrus               |
| 10     | MFGorb.R  | Middle frontal gyrus, orbital part        | 55     | FG.L   | Fusiform gyrus                         |
| 11     | IFGoper.L | Inferior frontal gyrus, opercular part    | 56     | FG.R   | Fusiform gyrus                         |
| 12     | IFGoper.R | Inferior frontal gyrus, opercular part    | 57     | PoCG.L | Postcentral gyrus                      |
| 13     | IFGtri.L  | Inferior frontal gyrus, triangular part   | 58     | PoCG.R | Postcentral gyrus                      |
| 14     | IFGtri.R  | Inferior frontal gyrus, triangular part   | 59     | SPG.L  | Superior parietal gyrus                |
| 15     | IFGorb.L  | Inferior frontal gyrus, orbital part      | 60     | SPG.R  | Superior parietal gyrus                |
| 16     | IFGorb.R  | Inferior frontal gyrus, orbital part      | 61     | IPG.L  | Inferior parietal gyrus                |
| 17     | ROL.L     | Rolandic operculum                        | 62     | IPG.R  | Inferior parietal gyrus                |
| 18     | ROL.R     | Rolandic operculum                        | 63     | SMG.L  | Supramarginal gyrus                    |
| 19     | SMA.L     | Supplementary motor area                  | 64     | SMG.R  | Supramarginal gyrus                    |
| 20     | SMA.R     | Supplementary motor area                  | 65     | ANG.L  | Angular gyrus                          |
| 21     | OLF.L     | Olfactory cortex                          | 66     | ANG.R  | Angular gyrus                          |
| 22     | OLF.R     | Olfactory cortex                          | 67     | PCUN.L | Precuneus                              |
| 23     | SFGmed.L  | Superior frontal gyrus, medial            | 68     | PCUN.R | Precuneus                              |
| 24     | SFGmed.R  | Superior frontal gyrus, medial            | 69     | PCL.L  | Paracentral lobule                     |
| 25     | SFGmorb.L | Superior frontal gyrus, medial orbital    | 70     | PCL.R  | Paracentral lobule                     |
| 26     | SFGmorb.R | Superior frontal gyrus, medial orbital    | 71     | CAU.L  | Caudate nucleus                        |
| 27     | REC.L     | Gyrus rectus                              | 72     | CAU.R  | Caudate nucleus                        |
| 28     | REC.R     | Gyrus rectus                              | 73     | PUT.L  | Lenticular nucleus, putamen            |
| 29     | INS.L     | Insula                                    | 74     | PUT.R  | Lenticular nucleus, putamen            |
| 30     | INS.R     | Insula                                    | 75     | PAL.L  | Lenticular nucleus, pallidum           |
| 31     | ACG.L     | Anterior cingulate and paracingulate gyri | 76     | PAL.R  | Lenticular nucleus, pallidum           |
| 32     | ACG.R     | Anterior cingulate and paracingulate gyri | 77     | THA.L  | Thalamus                               |
| 33     | MCG.L     | Median cingulate and paracingulate gyri   | 78     | THA.R  | Thalamus                               |
| 34     | MCG.R     | Median cingulate and paracingulate gyri   | 79     | HES.L  | Heschl gyrus                           |
| 35     | PCG.L     | Posterior cingulate gyrus                 | 80     | HES.R  | Heschl gyrus                           |
| 36     | PCG.R     | Posterior cingulate gyrus                 | 81     | STG.L  | Superior temporal gyrus                |
| 37     | HIP.L     | Hippocampus                               | 82     | STG.R  | Superior temporal gyrus                |
| 38     | HIP.R     | Hippocampus                               | 83     | STGp.L | Superior temporal gyrus: temporal pole |
| 39     | PHIP.L    | Parahippocampal gyrus                     | 84     | STGp.R | Superior temporal gyrus: temporal pole |
| 40     | PHIP.R    | Parahippocampal gyrus                     | 85     | MTG.L  | Middle temporal gyrus                  |
| 41     | AMYG.L    | Amygdala                                  | 86     | MTG.R  | Middle temporal gyrus                  |
| 42     | AMYG.R    | Amygdala                                  | 87     | MTGp.L | Middle temporal gyrus: temporal pole   |
| 43     | CAL.L     | Calcarine fissure and surrounding cortex  | 88     | MTGp.R | Middle temporal gyrus: temporal pole   |
| 44     | CAL.R     | Calcarine fissure and surrounding cortex  | 89     | ITG.L  | Inferior temporal gyrus                |
| 45     | CUN.L     | Cuneus                                    | 90     | ITG.R  | Inferior temporal gyrus                |
